# Supplementary material for: Evaluating in the Real-World Educational Intervention to Improve Interference Control in Children with Autism Spectrum Disorder
Source: Children (Basel). 2022 Aug 26;9(9):1294. doi: 10.3390/children9091294 (PMC9497143; doi:10.3390/children9091294)
Supplement: Supplementary file 1 [file children-09-01294-s001.zip]

Archive with 4 entries (4 files):
- Supplementary material-8.26/Figure S1_organizacional structure of the intervention.jpg
- Supplementary material-8.26/Figure S2_ self-regulation prompts.jpg
- Supplementary material-8.26/S1_Explanation of the tasks and activities of the intervention.pdf
- Supplementary material-8.26/Table S1_OI e.g..pdf
